# Supplementary material
Source: PubMed Central journal article supplement (PMC11058115)
Supplement: NIHMS1951665-supplement-Supplementary_Material.pdf [file NIHMS1951665-supplement-Supplementary_Material.pdf]

## Supplementary Materials

### Supplementary Table 1

Descriptive Statistics between the Current Study Sample and Participants Excluded from the Current Study Sample

|                                                        | Sample who<br>reported AARC<br>and pain in 2019<br>and 2020 (n= 434) | Sample who<br>reported data on<br>pain in 2019 but<br>not in 2020 (n=<br>579) | p-value |
|--------------------------------------------------------|----------------------------------------------------------------------|-------------------------------------------------------------------------------|---------|
| Age, M (SD)                                            | 65.50 (6.94)                                                         | 65.06 (7.22)                                                                  | .331    |
| Women, n (%)                                           | 375 (86.4)                                                           | 480 (82.9)                                                                    | .128    |
| Married, n (%)                                         | 323 (78.8)                                                           | 436 (78.8)                                                                    | .981    |
| Education, n (%)                                       |                                                                      |                                                                               |         |
| Secondary education                                    | 47 (10.8)                                                            | 96 (16.6)                                                                     | .018    |
| Post-secondary education                               | 47 (10.8)                                                            | 50 (8.6)                                                                      |         |
| Vocational qualification                               | 86 (19.8)                                                            | 114 (19.7)                                                                    |         |
| Undergraduate degree                                   | 160 (36.9)                                                           | 184 (31.8)                                                                    |         |
| Post-graduate degree                                   | 74 (17.1)                                                            | 120 (20.7)                                                                    |         |
| Doctorate                                              | 20 (4.6)                                                             | 15 (2.6)                                                                      |         |
| White ethnicity, n (%)                                 | 431 (99.3)                                                           | 525 (90.7)                                                                    | .056    |
| Employed, n (%)                                        | 160 (37.7)                                                           | 229 (41.0)                                                                    | .292    |
| Pain at baseline, M (SD)                               | 1.02 (2.72)                                                          | 1.24 (2.92)                                                                   | .232    |
| Awareness of age-related losses at<br>baseline, M (SD) | 9.85 (3.27)                                                          | 10.23 (3.47)                                                                  | .080    |
| Awareness of age-related gains at<br>baseline, M (SD)  | 18.74 (3.67)                                                         | 18.64 (3.77)                                                                  | .660    |

## Supplementary Table 2

Summary of Original Metabolic Weights and Revised Weights for Selected Items to Adjust for Performance by Older Adults: CHAMPS Physical Activity Questionnaire for Older Adults

| Questionnaire Item                                                                    | Comparable MET Values From Ainsworth and Colleagues and Rationale for Adjustment                                                   | CHAMPS Metabolic Weight |
|---------------------------------------------------------------------------------------|------------------------------------------------------------------------------------------------------------------------------------|-------------------------|
| Dance (such as square, folk, line, ballroom) (do <u>not</u> count aerobic dance here) | Average of: (emphasis on general dancing)<br>General dancing=4.5<br>Square=5.5<br>Folk=5.5<br>Ballroom slow=3.0<br>Line=5.5        | 4.5                     |
| Play golf, carrying or pulling your equipment (count <u>walking time</u> only)        | Golf pulling clubs 5.0<br>Adjusted down to accommodate older adults' expenditure and to accommodate nature of golf (walking 3 mph) | 3.0                     |
| Play golf, riding a cart (count <u>walking time</u> only)                             | Golf using power cart 3.5<br>Adjusted down to accommodate older adults' expenditure and to accommodate nature of golf              | 2.0                     |
| Play singles tennis (do <u>not</u> count doubles)                                     | Singles tennis 8.0<br>Adjusted down for reduced exertion of older adults                                                           | 6.0                     |
| Play doubles tennis (do <u>not</u> count singles)                                     | Doubles tennis 6.0<br>Adjusted down for reduced exertion of older adults                                                           | 4.0                     |
| Skate (ice, roller, in-line)                                                          | Roller skating 7.0<br>Adjusted down to be similar to very very brisk walk                                                          | 4.5                     |
| Do heavy work around the house (such as washing windows, cleaning gutters)            | Washing windows 4.5<br>Adjusted down to account for lack of specificity of task                                                    | 3.0                     |
| Do light work around the house (such as sweeping or vacuuming)                        | Light cleaning, moderate effort = 2.5                                                                                              | 2.5                     |
| Do heavy gardening (such as spading, raking)                                          | Average of:<br>spading 5.0<br>mowing power 4.5                                                                                     | 4.0                     |

| Questionnaire Item                                                                                                | Comparable MET Values From Ainsworth and Colleagues and Rationale for Adjustment                                                                                                                                              | CHAMPS Metabolic Weight |
|-------------------------------------------------------------------------------------------------------------------|-------------------------------------------------------------------------------------------------------------------------------------------------------------------------------------------------------------------------------|-------------------------|
| Do light gardening (such as watering plants)                                                                      | weeding 4.5<br>planting bushes and seedlings 4.0<br>raking 4.0<br>trimming 4.5<br>sacking leaves 4.0<br>Adjusted to reflect intermittent nature of heavy gardening,<br>and because it uses small muscle groups<br>Average of: | 2.25                    |
| Work on your car, truck, lawn mower, or other machinery                                                           | Watering lawn or garden, standing or walking, 1.5<br>Walking/standing, picking up yard, light 3.0<br>Machine tooling, welding = 3.0<br>Auto report = 3.0                                                                      | 3.0                     |
| Jog or run                                                                                                        | Jogging general=7.0 (5 mph)<br>Jog/walk=6.0                                                                                                                                                                                   | 7.0                     |
| Walk uphill or hike uphill (count only uphill part)                                                               | Walking uphill 6.0                                                                                                                                                                                                            | 6.0                     |
| Walk <u>fast or briskly</u> for exercise (do <u>not</u> count walking leisurely or uphill)                        | Walking 3mph=3.5<br>Brisk walking 3.5mph=4.0<br>Selected lower value                                                                                                                                                          | 3.5                     |
| Walk <u>to do errands</u> (such as to/from a store or to take children to school ( <u>count walk time only</u> )) | Walking 2 mph=2.5<br>Probably average speed for older adults.                                                                                                                                                                 | 2.5                     |
| Walk <u>leisurely</u> for exercise or pleasure                                                                    | Walking 2 mph=2.5<br>Probably average speed for older adults.                                                                                                                                                                 | 2.5                     |
| Ride a bicycle or stationary cycle                                                                                | Average of:<br>Bicycling 10mph= 4.0<br>10-12 mph=6.0<br>Stationary cycling general = 5.0<br>Adjusted down for likely lower resistance for older adults                                                                        | 4.0                     |

| Questionnaire Item                                                                                            | Comparable MET Values From Ainsworth and Colleagues and Rationale for Adjustment                                                                                                                                                                                                                                                                                                                                                                                                                                                                    | CHAMPS Metabolic Weight |
|---------------------------------------------------------------------------------------------------------------|-----------------------------------------------------------------------------------------------------------------------------------------------------------------------------------------------------------------------------------------------------------------------------------------------------------------------------------------------------------------------------------------------------------------------------------------------------------------------------------------------------------------------------------------------------|-------------------------|
| Do other aerobic machines such as rowing or step machines (do <u>not</u> count treadmill or stationary cycle) | Comparable values:<br>Rowing ergometer, general =9.5<br>Rowing erg. light effort, 50W= 3.5<br>Rowing erg. moderate effort, 100W= 7.0<br>Rowing erg. very vigorous effort 200W=12<br>Ski machine, general=9.5<br>Cross country skiing light=7.0<br>Cross country skiing moderate speed and effort=8.0<br>Cross country skiing vigorous effort=9.0<br>MET of 7.0 reflects moderate effort rowing and light cross-country skiing.<br>Adjusted down because not much more expenditure than machines using legs only because people self-regulate effort | 5.0                     |
| Do water exercises (do <u>not</u> count other swimming)                                                       | Swimming, treading water, moderate effort, general=5.0<br>Adjusted as the estimated effort doing exercises in a swimming pool                                                                                                                                                                                                                                                                                                                                                                                                                       | 3.0                     |
| Swim moderately or fast                                                                                       | Swim crawl, slow, moderate or light effort=8.0<br>Adjusted down to account for way in which older adults swim on average                                                                                                                                                                                                                                                                                                                                                                                                                            | 5.0                     |
| Swim gently                                                                                                   | Swim leisurely = 6.0<br>Adjusted down to account for way in which older adults swim on average.                                                                                                                                                                                                                                                                                                                                                                                                                                                     | 3.0                     |
| Do stretching or flexibility exercises (do <u>not</u> count yoga or Tai Chi)                                  | Stretching and hatha yoga=4.0<br>Adjusted down for reduced exertion by older adults                                                                                                                                                                                                                                                                                                                                                                                                                                                                 | 2.0                     |
| Do yoga or Tai-Chi                                                                                            | Stretching and hatha yoga=4.0<br>Adjusted down for reduced exertion by older adults                                                                                                                                                                                                                                                                                                                                                                                                                                                                 | 2.0                     |
| Do aerobics or aerobic dancing                                                                                | Aerobic dance- low impact=5.0<br>Adjusted to low intensity aerobics at 3.5                                                                                                                                                                                                                                                                                                                                                                                                                                                                          | 3.5                     |

| Questionnaire Item                                                                                                           | Comparable MET Values From Ainsworth and Colleagues and Rationale for Adjustment                                                                                                                                      | CHAMPS Metabolic Weight |
|------------------------------------------------------------------------------------------------------------------------------|-----------------------------------------------------------------------------------------------------------------------------------------------------------------------------------------------------------------------|-------------------------|
| Do moderate to heavy strength training (such as hand-held weights of <u>more than 5 lbs.</u> , weight machines, or push-ups) | Push ups, heavy, vigorous effort 8.0<br>Weight lifting using free weights, nautilus, or universal type vigorous effort 6.0<br>Adjusted because caloric expenditure low compared to walking.                           | 4.5                     |
| Do light strength training (such as hand held weights of <u>5 lbs. or less</u> or elastic bands)                             | Weight lifting (free, nautilus or universal type) light or moderate effort 3.0                                                                                                                                        | 3.0                     |
| Do general conditioning exercises, such as light calisthenics or chair exercises (do <u>not</u> count strength training)     | Calisthenics, home exercise, light or moderate, up and down from floor=4.5<br>Adjusted for reduced effort of older adults                                                                                             | 2.5                     |
| Play basketball, soccer, or racquetball (do <u>not</u> count time on sidelines)                                              | Average of:<br>Basketball: game=8.0<br>Nongame, general=6.0<br>Shooting baskets=4.5<br>Soccer & racketball, competitive=10.0 Soccer & racketball, casual, general 7.0<br>Adjusted for lower expenditure in this sport | 5.0                     |
| <i>Note.</i> This table is identical to the table published in Stewart et al. (2001). We report it here for convenience.     |                                                                                                                                                                                                                       |                         |
